# Supplementary material
Source: Springer Nature journal article supplement (https://www.springermedizin.de/resource/supplementary/13046_2011_471_MOESM11_ESM.pdf/9662298)

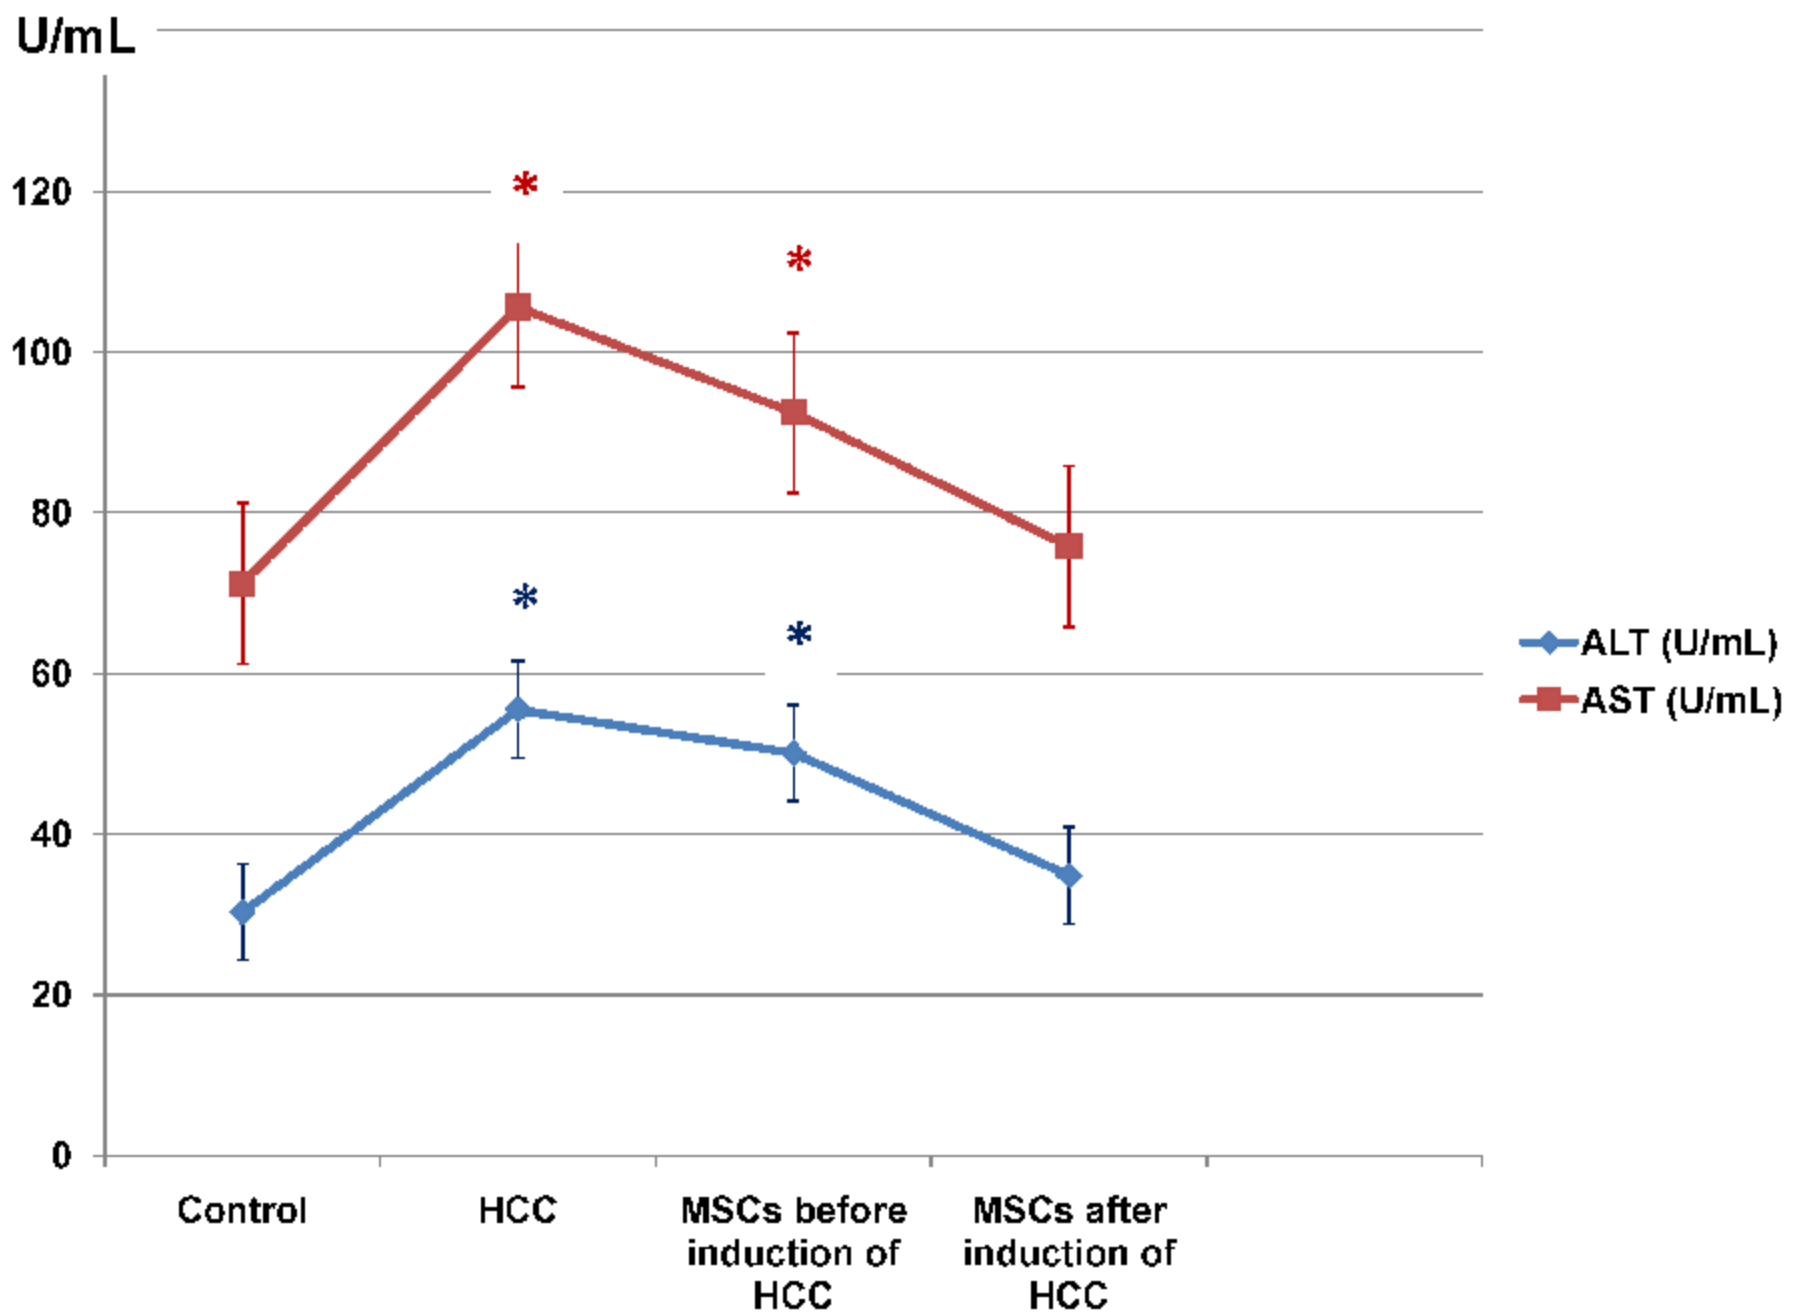

Supplement: MOESM11 [file 9662298]
